# Supplementary material for: Designing dual-emission phosphors for temperature warning indication and dual-mode luminescence thermometry
Source: Royal Society of Chemistry journal article supplement (doi:10.1039/d3dt01525d), 2023-01-01
Supplement: d3dt01525d1.pdf [file d3dt01525d1.pdf]

## Supplementary Information

### Designing dual-emission phosphors for temperature warning indication and dual-mode luminescence thermometry

Li Li<sup>a\*</sup>, Xinji Li<sup>b</sup>, Zhaojie Wu<sup>a</sup>, Yongbin Hua<sup>c</sup>, Xianju Zhou<sup>a</sup>, Yongjie Wang<sup>a</sup>,  
Zhongmin Cao<sup>a</sup>, Sha Jiang<sup>a</sup>, Guotao Xiang<sup>a</sup>, Jae Su Yu<sup>c\*</sup>

<sup>a</sup>School of Science, Chongqing University of Posts and Telecommunications, Chongqing, 400065, P. R. China

<sup>b</sup>School of Optoelectronic Engineering, Chongqing University of Posts and Telecommunications, Chongqing 400065, PR China

<sup>c</sup>Department of Electronics and Information Convergence Engineering, Institute for Wearable Convergence Electronics, Kyung Hee University, Yongin-si, Gyeonggi-do, 17104, Republic of Korea

**Keywords:** Dual-emission center, LIR, Lifetime, Luminescence thermometry

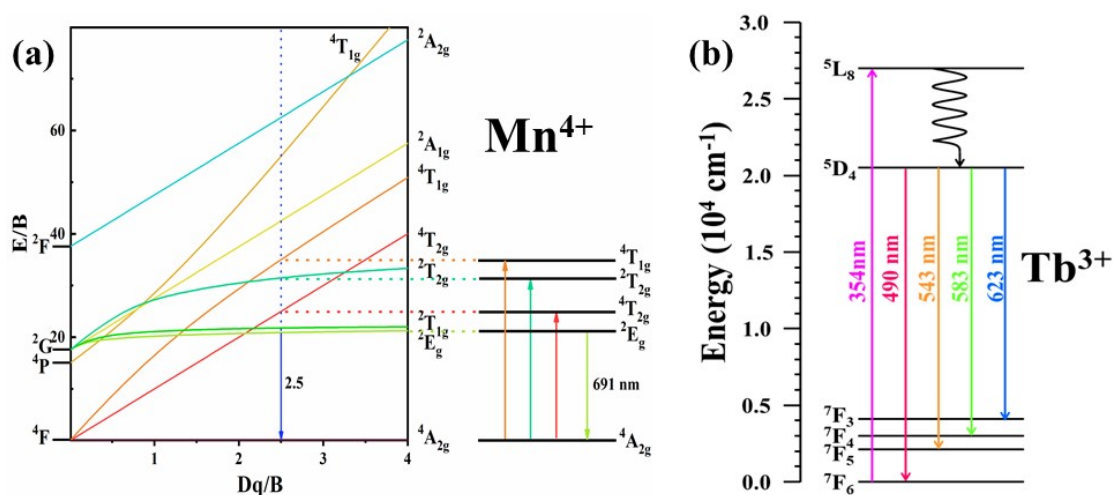

**Fig. S1.** (a) Tanabe-Sugano energy-level diagram of  $\text{Mn}^{4+}$  in an octahedral crystal field. (b) Simplify energy transfer process from  $\text{Tb}^{3+}$ .

\* Corresponding author. Li Li; E-mail: [lilic@cqupt.edu.cn](mailto:lilic@cqupt.edu.cn). Jae Su Yu; E-mail: [jsyu@khu.ac.kr](mailto:jsyu@khu.ac.kr).

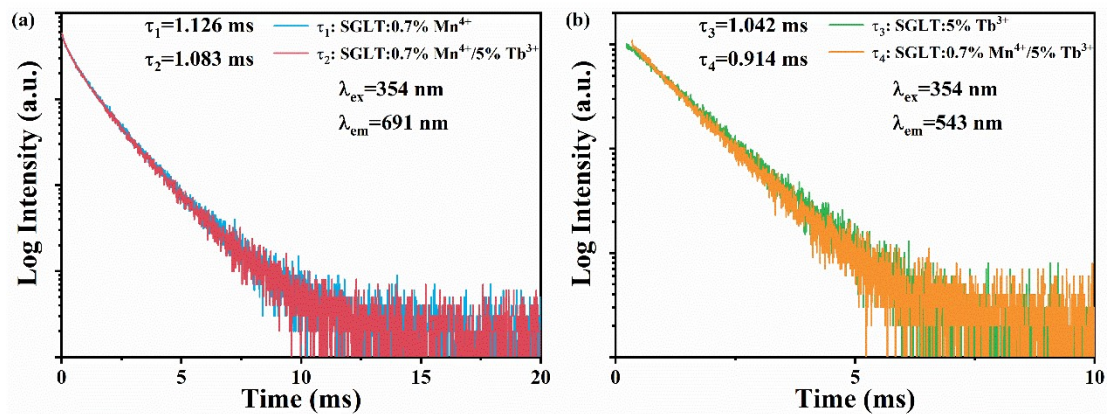

**Fig. S2.** The fluorescence decay curves of (a)  $\text{Mn}^{4+}$  ions at 691nm and (b)  $\text{Tb}^{3+}$  ions at 543nm are excitation at 354nm.

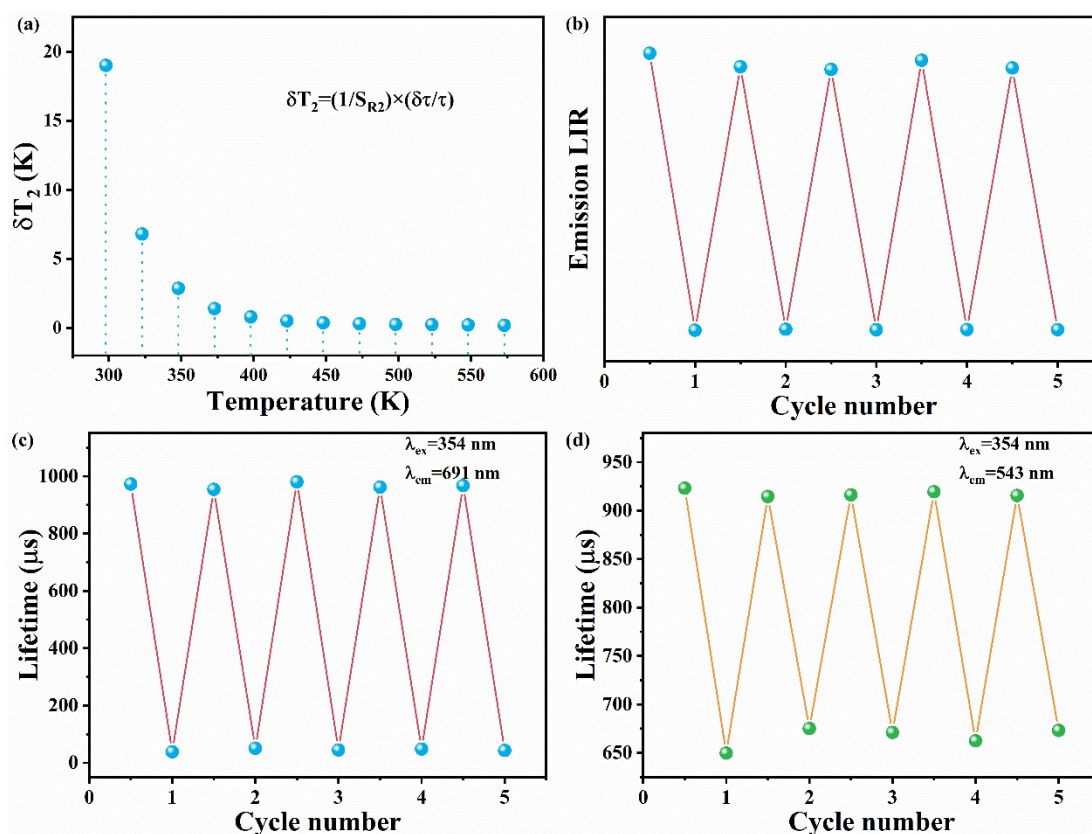

**Fig. S3.** (a) Temperature uncertainty based on lifetime monitoring at 691 nm under excitation at 354nm. (b) LIR stability of the SGLT: 0.7% $\text{Mn}^{4+}$ /5% $\text{Tb}^{3+}$  phosphor under the 354nm excitation. Lifetime stability of the SGLT: 0.7% $\text{Mn}^{4+}$ /5% $\text{Tb}^{3+}$  phosphor monitoring at (c) 691 nm and (d) 543 nm under excitation at 354nm.
